# Supplementary material for: Rapid Prediction of Moisture Content in Intact Green Coffee Beans Using Near Infrared Spectroscopy
Source: PubMed Central journal article supplement (PMC5447914; doi:10.3390/foods6050038), 2017-05-19

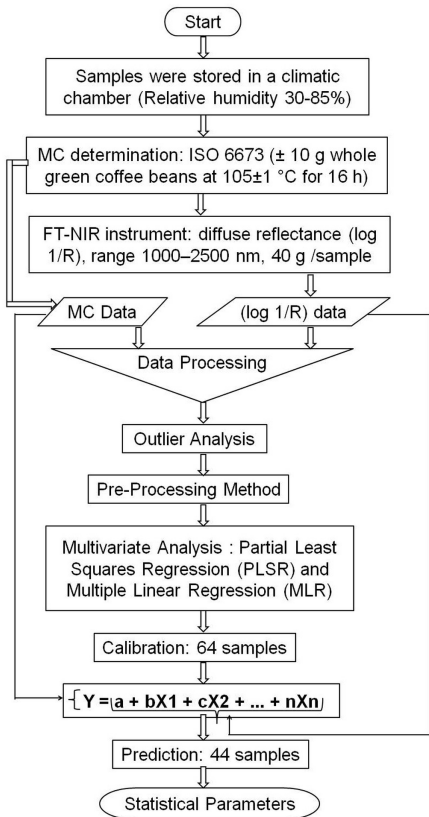

Supplement: foods-06-00038-s001.pdf [file foods-06-00038-s001.pdf]
